# Supplementary material for: Size-segregated characteristics of OC, EC and organic matters in PM emitted from different types of ships in China
Source: Copernicus journal article supplement (doi:10.5194/acp-2019-363), 2019-07-09
Supplement: Supplementary file [file acp-2019-363-AC1-supplement.zip]

# **Size-segregated characteristics of OC, EC and organic matters in PM emitted from different types of ships in China**

**Fan Zhang<sup>1,2</sup>, Hai Guo<sup>1\*</sup>, Yingjun Chen<sup>2,3,4\*</sup>, Volker Matthias<sup>5</sup>, Yan Zhang<sup>2</sup>, Xin Yang<sup>2,4</sup>, Jianmin Chen<sup>2</sup>**

5   <sup>1</sup>Air Quality Studies, Department of Civil and Environmental Engineering, The Hong Kong Polytechnic University, Hong Kong, P.R. China

<sup>2</sup>Shanghai Key Laboratory of Atmospheric Particle Pollution and Prevention (LAP3), Department of Environmental Science and Engineering, Fudan University, Shanghai 200092, P.R. China

10   <sup>3</sup>Key Laboratory of Pollution Control and Resource Reuse, College of Environmental Science and Engineering, Tongji University, Shanghai 200092, P.R. China

<sup>4</sup>Shanghai Institute of Pollution Control and Ecological Security, Shanghai 200092, P.R. China

<sup>5</sup>Helmholtz-Zentrum Geesthacht, Institute of Coastal Research, Max-Planck-Straße 1,  
15   21502 Geesthacht, Germany

**Correspondence:** Hai Guo (hai.guo@polyu.edu.hk)

Yingjun Chen (yjchenfd@fudan.edu.cn)

Table S1 Technical parameters of test vessels

| Vessel ID | Engine power (kW) | Vessel type        | Length × width (m) | Material | Vessel age (year) | Rated speed (rpm) | Engine type | Fuel type     | Classified Type |
|-----------|-------------------|--------------------|--------------------|----------|-------------------|-------------------|-------------|---------------|-----------------|
| GB1       | 91                | Gillnet            | 20×4.3             | Wooden   | 10                | 1500              | 4-stroke    | Diesel        | 4-LDF           |
| GB2       | 178               | Gillnet            | 27×5.6             | Wooden   | 7                 | 1500              | 4-stroke    | Diesel        |                 |
| AB1       | 129               | Angling boat       | 21×4.3             | Wooden   | 6                 | 1500              | 4-stroke    | Diesel        |                 |
| AB2       | 176               | Angling boat       | 22.7×4.8           | Wooden   | 5                 | 1800              | 4-stroke    | Diesel        |                 |
| TB1       | 88                | Trawler            | 13×3.5             | Wooden   | 8                 | 1500              | 4-stroke    | Diesels       |                 |
| TB2       | 132               | Trawler            | 13×3.5             | Wooden   | 5                 | 1500              | 4-stroke    | Diesel        |                 |
| TB5       | 265               | Trawler            | 29×5.4             | Metal    | 10                | 1800              | 4-stroke    | Diesel        |                 |
| TB6       | 265               | Trawler            | 29×5.4             | Metal    | 10                | 1800              | 4-stroke    | Diesel        |                 |
| HH        | 350×2             | Engineering vessel | 44×13              | Metal    | 4                 | 1200              | 4-stroke    | Marine Diesel | 4-HMV           |
| DFH       | 1600×2            | Research vessel    | 96×15              | Metal    | 18                | 900               | 4-stroke    | Marine Diesel |                 |
| XYH       | 600               | Research vessel    | 55×9               | Metal    | 5                 | 1000              | 4-stroke    | Marine Diesel |                 |
| YK        | 4440              | Training vessel    | 116×18             | Metal    | 11                | 173               | 2-stroke    | HFO           | 2-HHV           |

Table S2 Results of the fuel quality analysis

| Vessel ID | Carbon (C) % | Hydrogen (H) % | Oxygen (O) % | Nitrogen (N) % | Sulfur (S) % | Gross calorific value MJ/kg | Net calorific value MJ/kg | Kinematical viscosity (40°C) mm <sup>2</sup> /s |
|-----------|--------------|----------------|--------------|----------------|--------------|-----------------------------|---------------------------|-------------------------------------------------|
| GB1       | 85.96        | 12.76          | <0.3         | 0.49           | 0.022        | 45.83                       | 42.79                     | 4.517                                           |
| GB2       | 86.09        | 12.67          | 0.6          | 0.61           | 0.169        | 45.32                       | 42.41                     | 2.639                                           |
| AB1       | 86.35        | 12.73          | <0.3         | 0.49           | 0.111        | 45.79                       | 42.75                     | 2.430                                           |
| AB2       | 85.72        | 12.73          | <0.3         | 0.49           | 0.046        | 45.42                       | 42.48                     | 2.782                                           |
| TB1/TB2   | 86.21        | 11.50          | 2.03         | 0.05           | 0.066        | 45.01                       | 42.42                     | 4.125                                           |
| TB5/TB6   | 85.92        | 12.49          | <0.3         | 0.41           | 0.284        | 45.26                       | 42.37                     | 2.646                                           |
| HH        | 86.66        | 13.32          | < 0.4        | < 0.2          | 0.080        | 45.44                       | 42.51                     | N.A.                                            |
| DFH       | 86.40        | 13.22          | < 0.4        | < 0.2          | 0.046        | 45.40                       | 42.48                     | N.A.                                            |
| XYH       | 86.49        | 13.44          | < 0.4        | < 0.2          | 0.130        | 45.50                       | 42.55                     | N.A.                                            |
| YK        | 84.12        | 10.38          | 4.26         | 0.79           | 0.448        | 43.50                       | 41.10                     | N.A.                                            |

N.A., Not Analyzed.

Table S3 Size-resolved particle samples collected in this study

| Vessel ID | Operating mode         | Quantity | Dilution ratio | Vessel ID | Operating mode | Quantity | Dilution ratio |
|-----------|------------------------|----------|----------------|-----------|----------------|----------|----------------|
| YK        | Manoeuvring            | 2        | 1.7-1.8        | TB5       | Trawling       | 1        | 2.8            |
|           | Cruise                 | 3        | 2.2-2.6        | TB6       | Trawling       | 1        | 2.1            |
| GB1       | Placing/drawing in net | 1        | 4.2            |           | High speed     | 1        | 2.4            |
|           | cruise                 | 1        | 3.6            | HH        | Low speed      | 1        | 1.0            |
| GB2       | Idling                 | 1        | 2.6            |           | Cruise         | 2        | 1.0            |
|           | High speed             | 1        | 2.8            | XYH       | Idling         | 1        | 1.0            |
| AB1       | High speed             | 1        | 3.0            |           | Cruise         | 1        | 1.0            |
| AB2       | Idling/angling         | 2        | 2.8-3.0        | DFH       | Idling         | 1        | 1.0            |
| TB1       | Idling                 | 1        | 2.0            |           | Acceleration   | 2        | 1.0            |
|           | Medium speed           | 1        | 2.0            |           | Cruise         | 1        | 1.0            |
| TB2       | Idling                 | 1        | 2.0            |           |                |          |                |
|           | Medium speed           | 1        | 2.0            |           |                |          |                |

Table S4 Particle size fractions of 8 Stage Andersen Cascade Impactor

| Stage | Particle size range ( $\mu\text{m}$ ) | Sampling spot number |
|-------|---------------------------------------|----------------------|
| 0     | >9.0                                  | 96                   |
| 1     | 5.8-9.0                               | 96                   |
| 2     | 4.7-5.8                               | 400                  |
| 3     | 3.3-4.7                               | 400                  |
| 4     | 2.1-3.3                               | 400                  |
| 5     | 1.1-2.1                               | 400                  |
| 6     | 0.65-1.1                              | 400                  |
| 7     | 0.43-0.65                             | 201                  |
| 8     | <0.43                                 | --                   |

--, the sampling area in this stage is a circle with diameter of 7.94 cm.

Table S5 16 priority PAHs and their abbreviations

|                        | Abbreviation | Number of rings |
|------------------------|--------------|-----------------|
| Napthalene             | Nap          | 2               |
| Acenaphthylene         | Acy          | 2               |
| Acenaphthene           | Ace          | 2               |
| Fluorene               | Flu          | 3               |
| Phenanthrene           | Phe          | 3               |
| Anthracene             | Ant          | 3               |
| Fluoranthene           | Flua         | 4               |
| Pyrene                 | Pyr          | 4               |
| Benzo[a]anthracene     | BaA          | 4               |
| Chrysene               | Chr          | 4               |
| Benzo[b]fluoranthene   | BbF          | 5               |
| Benzo[k]fluoranthene   | BkF          | 5               |
| Benzo[a]pyrene         | BaP          | 5               |
| Indeno[1,2,3-cd]pyrene | IcdP         | 6               |
| Dibenzo[a,h]anthracene | DahA         | 5               |
| Benzo[ghi]perylene     | BghiP        | 6               |

Table S6 average recoveries of the deuterium surrogates

| D-PAHs            | Average recovery $\pm$ SD | D-n-alkanes | Average recovery $\pm$ SD |
|-------------------|---------------------------|-------------|---------------------------|
| D8- Napthalene    | 84.3 $\pm$ 10.5           | D-C16       | 95.0 $\pm$ 7.48           |
| D10- acenaphthene | 101 $\pm$ 11.8            | D-C20       | 96.1 $\pm$ 14.2           |
| D10- phenanthrene | 99.5 $\pm$ 8.24           | D-C24       | 97.2 $\pm$ 15.5           |
| D12- chrysene     | 95.1 $\pm$ 14.2           | D-C30       | 92.0 $\pm$ 14.9           |
| D12-perylene      | 84.8 $\pm$ 16.4           |             |                           |

Table S7 OC and EC distributions in different particle size bins (%)

|    | Particle size<br>( $\mu\text{m}$ ) | 2-HHV           | 4-HMV           | 4-LDF           |
|----|------------------------------------|-----------------|-----------------|-----------------|
| OC | <0.43                              | 74.7 $\pm$ 4.84 | 22.9 $\pm$ 11.2 | 42.6 $\pm$ 14.6 |
|    | 0.43-0.65                          | 7.10 $\pm$ 1.80 | 15.9 $\pm$ 3.52 | 21.5 $\pm$ 9.64 |
|    | 0.65-1.1                           | 4.61 $\pm$ 1.55 | 14.0 $\pm$ 2.93 | 9.62 $\pm$ 2.50 |
|    | 1.1-2.1                            | 3.48 $\pm$ 1.56 | 11.0 $\pm$ 2.23 | 7.12 $\pm$ 3.52 |
|    | 2.1-3.3                            | 3.18 $\pm$ 1.91 | 8.73 $\pm$ 2.27 | 4.96 $\pm$ 3.19 |
|    | 3.3-4.7                            | 2.24 $\pm$ 0.67 | 8.39 $\pm$ 2.67 | 4.89 $\pm$ 3.50 |
|    | 4.7-5.8                            | 2.15 $\pm$ 0.87 | 9.42 $\pm$ 5.83 | 4.85 $\pm$ 3.78 |
|    | 5.8-9.0                            | 1.34 $\pm$ 0.63 | 3.99 $\pm$ 0.94 | 2.08 $\pm$ 1.50 |
|    | >9.0                               | 1.18 $\pm$ 0.55 | 5.64 $\pm$ 2.32 | 2.33 $\pm$ 1.87 |
| EC | <0.43                              | 65.9 $\pm$ 9.87 | 27.3 $\pm$ 8.86 | 31.7 $\pm$ 13.3 |
|    | 0.43-0.65                          | 14.7 $\pm$ 6.65 | 22.0 $\pm$ 6.50 | 32.2 $\pm$ 11.1 |
|    | 0.65-1.1                           | 6.93 $\pm$ 1.76 | 18.8 $\pm$ 5.37 | 14.2 $\pm$ 6.11 |
|    | 1.1-2.1                            | 3.71 $\pm$ 1.68 | 16.3 $\pm$ 5.59 | 9.10 $\pm$ 4.58 |
|    | 2.1-3.3                            | 1.99 $\pm$ 2.42 | 4.92 $\pm$ 2.99 | 4.15 $\pm$ 2.29 |
|    | 3.3-4.7                            | 2.14 $\pm$ 2.08 | 3.45 $\pm$ 2.08 | 3.18 $\pm$ 2.90 |
|    | 4.7-5.8                            | 2.09 $\pm$ 1.89 | 2.03 $\pm$ 1.98 | 3.30 $\pm$ 3.22 |
|    | 5.8-9.0                            | 1.86 $\pm$ 2.47 | 1.02 $\pm$ 0.93 | 1.16 $\pm$ 1.21 |
|    | >9.0                               | 0.71 $\pm$ 0.67 | 4.22 $\pm$ 6.24 | 1.07 $\pm$ 0.88 |

Table S8 The distribution of total PAHs and total n-alkanes in different particle size

40

| bins (%)  |                   |                 |                 |                 |
|-----------|-------------------|-----------------|-----------------|-----------------|
|           | Particle size     | 2-HHV           | 4-HMV           | 4-LDF           |
|           | ( $\mu\text{m}$ ) |                 |                 |                 |
| PAHs      | <0.43             | 78.6 $\pm$ 2.78 | 37.6 $\pm$ 12.8 | 59.5 $\pm$ 13.1 |
|           | 0.43-0.65         | 4.90 $\pm$ 1.54 | 14.7 $\pm$ 8.72 | 16.4 $\pm$ 6.56 |
|           | 0.65-1.1          | 4.51 $\pm$ 0.81 | 14.0 $\pm$ 6.65 | 10.1 $\pm$ 4.51 |
|           | 1.1-2.1           | 2.32 $\pm$ 1.48 | 10.9 $\pm$ 7.14 | 5.56 $\pm$ 3.49 |
|           | 2.1-3.3           | 3.22 $\pm$ 1.43 | 7.52 $\pm$ 3.49 | 2.91 $\pm$ 2.45 |
|           | 3.3-4.7           | 2.27 $\pm$ 1.88 | 5.22 $\pm$ 2.26 | 2.10 $\pm$ 1.76 |
|           | 4.7-5.8           | 3.12 $\pm$ 0.75 | 5.58 $\pm$ 2.76 | 1.58 $\pm$ 2.05 |
|           | 5.8-9.0           | 0.49 $\pm$ 0.28 | 1.97 $\pm$ 1.55 | 0.72 $\pm$ 0.90 |
|           | >9.0              | 0.55 $\pm$ 0.25 | 2.47 $\pm$ 3.94 | 1.11 $\pm$ 2.10 |
| N-alkanes | <0.43             | 90.2 $\pm$ 2.99 | 54.4 $\pm$ 23.5 | 51.0 $\pm$ 17.2 |
|           | 0.43-0.65         | 2.05 $\pm$ 0.77 | 11.9 $\pm$ 6.47 | 16.1 $\pm$ 7.05 |
|           | 0.65-1.1          | 2.35 $\pm$ 0.79 | 12.7 $\pm$ 8.51 | 16.5 $\pm$ 11.9 |
|           | 1.1-2.1           | 1.39 $\pm$ 0.83 | 7.20 $\pm$ 6.47 | 7.07 $\pm$ 4.71 |
|           | 2.1-3.3           | 1.28 $\pm$ 0.43 | 5.65 $\pm$ 8.00 | 3.25 $\pm$ 2.60 |
|           | 3.3-4.7           | 0.80 $\pm$ 0.74 | 2.96 $\pm$ 3.42 | 2.80 $\pm$ 3.30 |
|           | 4.7-5.8           | 1.25 $\pm$ 0.44 | 3.27 $\pm$ 4.07 | 2.07 $\pm$ 2.26 |
|           | 5.8-9.0           | 0.32 $\pm$ 0.07 | 0.87 $\pm$ 1.38 | 0.54 $\pm$ 0.49 |
|           | >9.0              | 0.40 $\pm$ 0.09 | 1.02 $\pm$ 1.57 | 0.74 $\pm$ 1.00 |

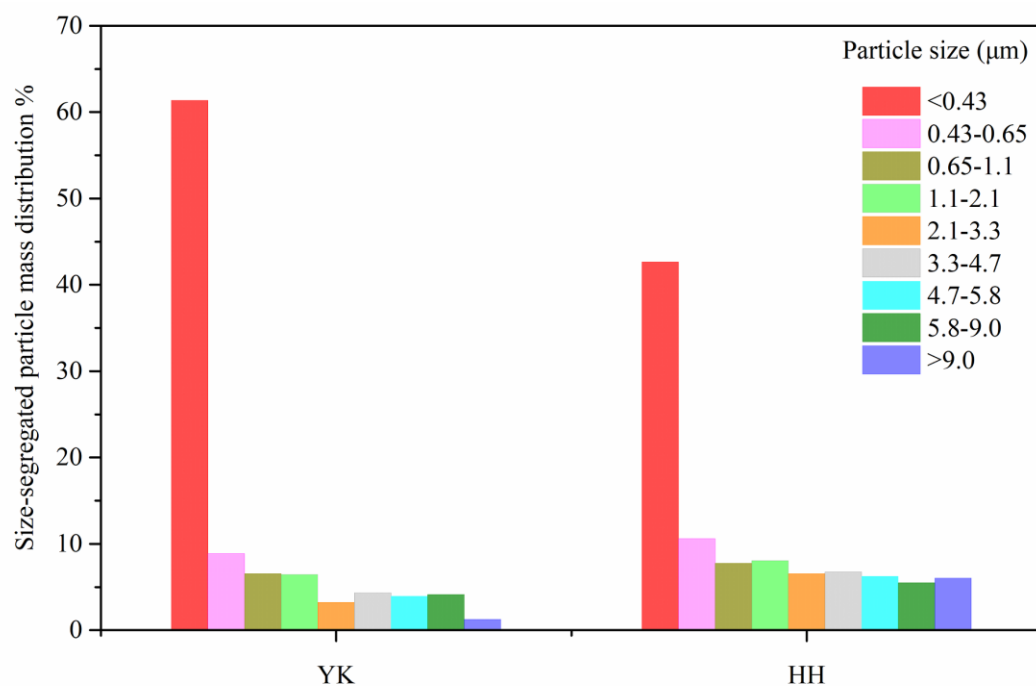

Figure S1 Size-segregated particle mass distribution of auxiliary engines

45

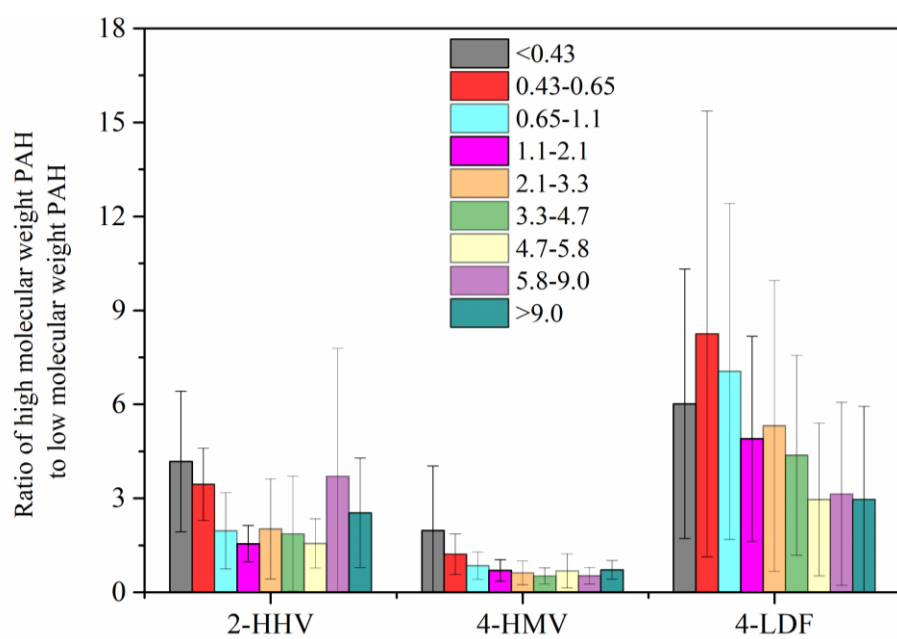

Figure S2 Ratio of high molecular weight PAH to low molecular weight PAH
